# Supplementary material
Source: MDPI journal article supplement (https://www.mdpi.com/2073-4395/12/12/3106)
Supplement: s1 [file s1]

Archive with 3 entries (3 files):
- Figure S1_.pdf
- Figure S2_.pdf
- Tables S1-S3_.pdf
